# Supplementary material for: When the Beetles Hit the Fan: The Fan-Trap, an Inexpensive, Light and Scalable Insect Trap under a Creative Commons License, for Monitoring and Experimental Use
Source: Insects. 2022 Dec 5;13(12):1122. doi: 10.3390/insects13121122 (PMC9784568; doi:10.3390/insects13121122)
Supplement: Supplementary file 1 [file insects-13-01122-s001.zip]

Archive with 7 entries (7 files):
- Supplementary_S1_Fantrap_description.pdf
- Supplementary_S2_Table_S2.csv
- Supplementary_S3_Table_S3.csv
- Supplementary_S4_Fantrap_Blueprint_Fantrap1.svg
- Supplementary_S5_Fantrap_Blueprint_Fantrap2.svg
- Supplementary_S6_Fantrap_Blueprint_Fantrap3.svg
- Supplementary_S6_Fantrap_Blueprint_Fantrap3nested.ai
