# Supplementary material for: When the Beetles Hit the Fan: The Fan-Trap, an Inexpensive, Light and Scalable Insect Trap under a Creative Commons License, for Monitoring and Experimental Use
Source: Insects. 2022 Dec 5;13(12):1122. doi: 10.3390/insects13121122 (PMC9784568; doi:10.3390/insects13121122)
Supplement: Supplementary file 1 [file insects-13-01122-s001.zip › Supplementary_S2_Table_S2.csv]

Date	Block	Trap	Nb Ips typo
1/06/05	1	Fan-trap	1602
1/06/05	1	Bottle-trap	1104
1/06/05	2	Fan-trap	560
1/06/05	2	Bottle-trap	798
1/06/05	3	Fan-trap	946
1/06/05	3	Bottle-trap	1723
1/06/05	4	Fan-trap	1362
1/06/05	4	Bottle-trap	916
1/06/05	5	Fan-trap	678
1/06/05	5	Bottle-trap	776
1/06/05	6	Fan-trap	1290
1/06/05	6	Bottle-trap	937
1/06/05	7	Fan-trap	1865
1/06/05	7	Bottle-trap	1477
1/06/05	8	Fan-trap	1131
1/06/05	8	Bottle-trap	1145
1/06/05	9	Fan-trap	563
1/06/05	9	Bottle-trap	842
1/06/05	10	Fan-trap	1729
1/06/05	10	Bottle-trap	979
1/06/05	11	Fan-trap	822
1/06/05	11	Bottle-trap	684
1/06/05	12	Fan-trap	1102
1/06/05	12	Bottle-trap	944
1/06/05	13	Fan-trap	396
1/06/05	13	Bottle-trap	432
1/06/05	14	Fan-trap	1728
1/06/05	14	Bottle-trap	1579
1/06/05	15	Fan-trap	1078
1/06/05	15	Bottle-trap	2244
6/07/05	1	Fan-trap	3990
6/07/05	1	Bottle-trap	2748
6/07/05	2	Fan-trap	3875
6/07/05	2	Bottle-trap	3256
6/07/05	3	Fan-trap	2375
6/07/05	3	Bottle-trap	5391
6/07/05	4	Fan-trap	4608
6/07/05	4	Bottle-trap	1831
6/07/05	5	Fan-trap	3862
6/07/05	5	Bottle-trap	3250
6/07/05	6	Fan-trap	3306
6/07/05	6	Bottle-trap	5818
6/07/05	7	Fan-trap	4249
6/07/05	7	Bottle-trap	3794
6/07/05	8	Fan-trap	3995
6/07/05	8	Bottle-trap	4231
6/07/05	9	Fan-trap	2099
6/07/05	9	Bottle-trap	2178
6/07/05	10	Fan-trap	5171
6/07/05	10	Bottle-trap	2632
6/07/05	11	Fan-trap	3148
6/07/05	11	Bottle-trap	1860
6/07/05	12	Fan-trap	3096
6/07/05	12	Bottle-trap	1881
6/07/05	13	Fan-trap	616
6/07/05	13	Bottle-trap	985
6/07/05	14	Fan-trap	3092
6/07/05	14	Bottle-trap	2048
6/07/05	15	Fan-trap	2884
6/07/05	15	Bottle-trap	5301
10/08/05	1	Fan-trap	2154
10/08/05	1	Bottle-trap	2053
10/08/05	2	Fan-trap	1576
10/08/05	2	Bottle-trap	1259
10/08/05	3	Fan-trap	1143
10/08/05	3	Bottle-trap	3024
10/08/05	4	Fan-trap	681
10/08/05	4	Bottle-trap	274
10/08/05	5	Fan-trap	1422
10/08/05	5	Bottle-trap	1274
10/08/05	6	Fan-trap	1414
10/08/05	6	Bottle-trap	1623
10/08/05	7	Fan-trap	1160
10/08/05	7	Bottle-trap	807
10/08/05	8	Fan-trap	2392
10/08/05	8	Bottle-trap	2190
10/08/05	9	Fan-trap	874
10/08/05	9	Bottle-trap	818
10/08/05	10	Fan-trap	2407
10/08/05	10	Bottle-trap	1616
10/08/05	11	Fan-trap	1386
10/08/05	11	Bottle-trap	745
10/08/05	12	Fan-trap	835
10/08/05	12	Bottle-trap	1071
10/08/05	13	Fan-trap	627
10/08/05	13	Bottle-trap	623
10/08/05	14	Fan-trap	2822
10/08/05	14	Bottle-trap	2669
10/08/05	15	Fan-trap	1625
10/08/05	15	Bottle-trap	2139
16/09/05	1	Fan-trap	464
16/09/05	1	Bottle-trap	333
16/09/05	2	Fan-trap	454
16/09/05	2	Bottle-trap	381
16/09/05	3	Fan-trap	450
16/09/05	3	Bottle-trap	974
16/09/05	4	Fan-trap	639
16/09/05	4	Bottle-trap	533
16/09/05	5	Fan-trap	171
16/09/05	5	Bottle-trap	211
16/09/05	6	Fan-trap	719
16/09/05	6	Bottle-trap	509
16/09/05	7	Fan-trap	629
16/09/05	7	Bottle-trap	708
16/09/05	8	Fan-trap	534
16/09/05	8	Bottle-trap	402
16/09/05	9	Fan-trap	726
16/09/05	9	Bottle-trap	525
16/09/05	10	Fan-trap	968
16/09/05	10	Bottle-trap	536
16/09/05	11	Fan-trap	573
16/09/05	11	Bottle-trap	603
16/09/05	12	Fan-trap	693
16/09/05	12	Bottle-trap	319
16/09/05	13	Fan-trap	128
16/09/05	13	Bottle-trap	167
16/09/05	14	Fan-trap	2169
16/09/05	14	Bottle-trap	1762
16/09/05	15	Fan-trap	2707
16/09/05	15	Bottle-trap	2754
