# Supplementary material for: When the Beetles Hit the Fan: The Fan-Trap, an Inexpensive, Light and Scalable Insect Trap under a Creative Commons License, for Monitoring and Experimental Use
Source: Insects. 2022 Dec 5;13(12):1122. doi: 10.3390/insects13121122 (PMC9784568; doi:10.3390/insects13121122)
Supplement: Supplementary file 1 [file insects-13-01122-s001.zip › Supplementary_S3_Table_S3.csv]

N° Relevé	Date relevé	No trap	Trap model	Attractif	Ips typographus	Trypodendron domesticum	Trypodendron lineatum	Trypodendron signatum	Anisandrus dispar
1	28/04/05	2	Bouteille	Lineatine (W) + ethanol	24	4	11	18	1
1	28/04/05	2	Bouteille	Lineatine (W) + ethanol	7	1	10	37	0
1	28/04/05	2	Bouteille	Lineatine (W) + ethanol	10	1	7	49	0
1	28/04/05	2	Bouteille	Lineatine (W) + ethanol	2	1	13	34	0
1	28/04/05	2	Bouteille	Lineatine (W) + ethanol	3	1	9	36	0
1	28/04/05	2	Bouteille	Lineatine (W) + ethanol	2	3	27	69	0
1	28/04/05	2	Bouteille	Lineatine (W) + ethanol	13	2	3	24	4
1	28/04/05	2	Bouteille	Lineatine (W) + ethanol	7	3	5	25	7
1	28/04/05	2	Bouteille	Lineatine (W) + ethanol	1	7	11	37	18
1	28/04/05	2	Bouteille	Lineatine (W) + ethanol	3	4	35	41	17
1	28/04/05	3	Cornet	Lineatine (W) + ethanol	3	3	7	24	0
1	28/04/05	3	Cornet	Lineatine (W) + ethanol	1	1	13	32	0
1	28/04/05	3	Cornet	Lineatine (W) + ethanol	12	5	17	47	0
1	28/04/05	3	Cornet	Lineatine (W) + ethanol	10	5	9	35	0
1	28/04/05	3	Cornet	Lineatine (W) + ethanol	4	0	23	46	1
1	28/04/05	3	Cornet	Lineatine (W) + ethanol	1	3	23	76	0
1	28/04/05	3	Cornet	Lineatine (W) + ethanol	2	3	2	17	8
1	28/04/05	3	Cornet	Lineatine (W) + ethanol	3	1	11	26	7
1	28/04/05	3	Cornet	Lineatine (W) + ethanol	3	3	15	35	15
1	28/04/05	3	Cornet	Lineatine (W) + ethanol	1	2	6	33	4
1	28/04/05	1	IPM	Lineatine (W) + ethanol	68	11	57	135	0
1	28/04/05	1	IPM	Lineatine (W) + ethanol	15	5	43	134	1
1	28/04/05	1	IPM	Lineatine (W) + ethanol	230	8	29	72	0
1	28/04/05	1	IPM	Lineatine (W) + ethanol	25	11	23	74	2
1	28/04/05	1	IPM	Lineatine (W) + ethanol	96	18	42	56	0
1	28/04/05	1	IPM	Lineatine (W) + ethanol	31	13	23	72	3
1	28/04/05	1	IPM	Lineatine (W) + ethanol	3	22	81	45	3
1	28/04/05	1	IPM	Lineatine (W) + ethanol	146	7	26	68	5
1	28/04/05	1	IPM	Lineatine (W) + ethanol	10	16	17	64	12
1	28/04/05	1	IPM	Lineatine (W) + ethanol	32	9	58	167	30
1	28/04/05	4	Theysohn	Lineatine (W) + ethanol	7	7	10	86	0
1	28/04/05	4	Theysohn	Lineatine (W) + ethanol	7	21	33	64	11
1	28/04/05	4	Theysohn	Lineatine (W) + ethanol	8	4	17	34	3
1	28/04/05	4	Theysohn	Lineatine (W) + ethanol	4	3	19	54	5
1	28/04/05	4	Theysohn	Lineatine (W) + ethanol	2	15	23	139	9
1	28/04/05	4	Theysohn	Lineatine (W) + ethanol	181	22	14	58	5
1	28/04/05	4	Theysohn	Lineatine (W) + ethanol	5	6	10	48	0
1	28/04/05	4	Theysohn	Lineatine (W) + ethanol	7	2	39	77	20
1	28/04/05	4	Theysohn	Lineatine (W) + ethanol	69	7	18	96	8
1	28/04/05	4	Theysohn	Lineatine (W) + ethanol	11	9	44	63	3
2	12/05/05	2	Bouteille	Lineatine (W) + ethanol	41	4	14	98	10
2	12/05/05	2	Bouteille	Lineatine (W) + ethanol	9	2	16	43	0
2	12/05/05	2	Bouteille	Lineatine (W) + ethanol	16	1	11	57	16
2	12/05/05	2	Bouteille	Lineatine (W) + ethanol	2	3	8	47	24
2	12/05/05	2	Bouteille	Lineatine (W) + ethanol	10	7	31	74	34
2	12/05/05	2	Bouteille	Lineatine (W) + ethanol	3	9	25	81	62
2	12/05/05	2	Bouteille	Lineatine (W) + ethanol	5	5	41	107	15
2	12/05/05	2	Bouteille	Lineatine (W) + ethanol	2	2	18	38	16
2	12/05/05	2	Bouteille	Lineatine (W) + ethanol	0	7	7	61	66
2	12/05/05	2	Bouteille	Lineatine (W) + ethanol	1	4	21	29	105
2	12/05/05	3	Cornet	Lineatine (W) + ethanol	18	7	23	85	5
2	12/05/05	3	Cornet	Lineatine (W) + ethanol	7	2	22	103	19
2	12/05/05	3	Cornet	Lineatine (W) + ethanol	8	7	43	131	42
2	12/05/05	3	Cornet	Lineatine (W) + ethanol	22	2	17	105	21
2	12/05/05	3	Cornet	Lineatine (W) + ethanol	1	2	16	47	41
2	12/05/05	3	Cornet	Lineatine (W) + ethanol	2	6	29	74	43
2	12/05/05	3	Cornet	Lineatine (W) + ethanol	8	5	27	84	79
2	12/05/05	3	Cornet	Lineatine (W) + ethanol	3	2	13	52	139
2	12/05/05	3	Cornet	Lineatine (W) + ethanol	0	3	22	62	140
2	12/05/05	3	Cornet	Lineatine (W) + ethanol	2	2	14	38	34
2	12/05/05	1	IPM	Lineatine (W) + ethanol	57	50	289	738	34
2	12/05/05	1	IPM	Lineatine (W) + ethanol	9	42	87	374	22
2	12/05/05	1	IPM	Lineatine (W) + ethanol	12	8	67	115	21
2	12/05/05	1	IPM	Lineatine (W) + ethanol	10	5	41	126	36
2	12/05/05	1	IPM	Lineatine (W) + ethanol	49	24	53	136	23
2	12/05/05	1	IPM	Lineatine (W) + ethanol	14	17	31	88	47
2	12/05/05	1	IPM	Lineatine (W) + ethanol	3	22	64	117	39
2	12/05/05	1	IPM	Lineatine (W) + ethanol	48	7	52	203	53
2	12/05/05	1	IPM	Lineatine (W) + ethanol	7	6	17	61	87
2	12/05/05	1	IPM	Lineatine (W) + ethanol	6	5	17	84	32
2	12/05/05	4	Theysohn	Lineatine (W) + ethanol	14	12	33	85	28
2	12/05/05	4	Theysohn	Lineatine (W) + ethanol	1	17	23	109	24
2	12/05/05	4	Theysohn	Lineatine (W) + ethanol	15	7	32	43	38
2	12/05/05	4	Theysohn	Lineatine (W) + ethanol	6	11	16	67	41
2	12/05/05	4	Theysohn	Lineatine (W) + ethanol	8	17	42	129	64
2	12/05/05	4	Theysohn	Lineatine (W) + ethanol	116	31	27	118	82
2	12/05/05	4	Theysohn	Lineatine (W) + ethanol	8	7	17	188	145
2	12/05/05	4	Theysohn	Lineatine (W) + ethanol	3	11	23	41	12
2	12/05/05	4	Theysohn	Lineatine (W) + ethanol	16	8	34	108	215
2	12/05/05	4	Theysohn	Lineatine (W) + ethanol	1	10	27	62	59
3	27/05/05	2	Bouteille	Pheroprax	115	0	0	0	0
3	27/05/05	2	Bouteille	Pheroprax	164	5	0	0	0
3	27/05/05	2	Bouteille	Pheroprax	96	5	0	0	0
3	27/05/05	2	Bouteille	Pheroprax	101	0	0	0	0
3	27/05/05	2	Bouteille	Pheroprax	121	0	0	0	0
3	27/05/05	2	Bouteille	Pheroprax	356	0	0	0	0
3	27/05/05	2	Bouteille	Pheroprax	281	0	0	0	0
3	27/05/05	2	Bouteille	Pheroprax	218	0	0	0	0
3	27/05/05	2	Bouteille	Pheroprax	183	0	0	0	0
3	27/05/05	2	Bouteille	Pheroprax	217	0	0	0	0
3	27/05/05	3	Cornet	Pheroprax	97	0	0	0	0
3	27/05/05	3	Cornet	Pheroprax	89	0	0	0	0
3	27/05/05	3	Cornet	Pheroprax	124	6	0	0	0
3	27/05/05	3	Cornet	Pheroprax	194	20	0	0	4
3	27/05/05	3	Cornet	Pheroprax	107	5	0	0	1
3	27/05/05	3	Cornet	Pheroprax	401	0	0	0	0
3	27/05/05	3	Cornet	Pheroprax	266	3	0	0	0
3	27/05/05	3	Cornet	Pheroprax	103	1	0	0	0
3	27/05/05	3	Cornet	Pheroprax	110	0	0	0	0
3	27/05/05	3	Cornet	Pheroprax	129	0	0	0	0
3	27/05/05	1	IPM	Pheroprax	1745	6	0	0	0
3	27/05/05	1	IPM	Pheroprax	1227	3	0	0	0
3	27/05/05	1	IPM	Pheroprax	1654	0	0	0	0
3	27/05/05	1	IPM	Pheroprax	1017	3	0	0	0
3	27/05/05	1	IPM	Pheroprax	1691	2	2	0	1
3	27/05/05	1	IPM	Pheroprax	2996	13	0	0	0
3	27/05/05	1	IPM	Pheroprax	1986	0	0	0	0
3	27/05/05	1	IPM	Pheroprax	886	2	0	0	0
3	27/05/05	1	IPM	Pheroprax	1006	17	11	0	8
3	27/05/05	1	IPM	Pheroprax	4020	0	0	0	0
3	27/05/05	4	Theysohn	Pheroprax	896	44	2	0	8
3	27/05/05	4	Theysohn	Pheroprax	739	41	7	0	4
3	27/05/05	4	Theysohn	Pheroprax	942	11	7	0	1
3	27/05/05	4	Theysohn	Pheroprax	1363	8	5	0	0
3	27/05/05	4	Theysohn	Pheroprax	2214	12	0	0	3
3	27/05/05	4	Theysohn	Pheroprax	1186	7	0	0	4
3	27/05/05	4	Theysohn	Pheroprax	625	0	0	0	0
3	27/05/05	4	Theysohn	Pheroprax	1456	51	20	0	0
3	27/05/05	4	Theysohn	Pheroprax	2639	3	0	0	4
3	27/05/05	4	Theysohn	Pheroprax	1245	5	0	0	3
4	10/06/05	2	Bouteille	Pheroprax	79	0	0	0	0
4	10/06/05	2	Bouteille	Pheroprax	45	0	0	0	0
4	10/06/05	2	Bouteille	Pheroprax	44	0	0	0	1
4	10/06/05	2	Bouteille	Pheroprax	45	0	0	0	0
4	10/06/05	2	Bouteille	Pheroprax	37	0	0	0	0
4	10/06/05	2	Bouteille	Pheroprax	133	0	0	0	0
4	10/06/05	2	Bouteille	Pheroprax	39	0	0	0	0
4	10/06/05	2	Bouteille	Pheroprax	48	0	0	0	0
4	10/06/05	2	Bouteille	Pheroprax	95	0	0	0	0
4	10/06/05	2	Bouteille	Pheroprax	106	0	0	0	0
4	10/06/05	3	Cornet	Pheroprax	30	0	0	0	0
4	10/06/05	3	Cornet	Pheroprax	44	0	0	0	2
4	10/06/05	3	Cornet	Pheroprax	81	0	0	0	0
4	10/06/05	3	Cornet	Pheroprax	46	0	0	0	3
4	10/06/05	3	Cornet	Pheroprax	32	0	0	0	0
4	10/06/05	3	Cornet	Pheroprax	112	0	0	0	0
4	10/06/05	3	Cornet	Pheroprax	143	0	0	0	2
4	10/06/05	3	Cornet	Pheroprax	81	0	0	0	0
4	10/06/05	3	Cornet	Pheroprax	59	0	0	0	0
4	10/06/05	3	Cornet	Pheroprax	50	0	0	0	0
4	10/06/05	1	IPM	Pheroprax	289	0	0	0	1
4	10/06/05	1	IPM	Pheroprax	288	0	0	0	0
4	10/06/05	1	IPM	Pheroprax	272	0	0	0	0
4	10/06/05	1	IPM	Pheroprax	224	0	0	0	0
4	10/06/05	1	IPM	Pheroprax	439	0	0	0	0
4	10/06/05	1	IPM	Pheroprax	250	0	0	0	0
4	10/06/05	1	IPM	Pheroprax	177	0	0	0	1
4	10/06/05	1	IPM	Pheroprax	238	0	0	0	3
4	10/06/05	1	IPM	Pheroprax	233	0	0	0	0
4	10/06/05	1	IPM	Pheroprax	429	0	0	0	0
4	10/06/05	4	Theysohn	Pheroprax	435	0	0	0	0
4	10/06/05	4	Theysohn	Pheroprax	349	3	0	0	0
4	10/06/05	4	Theysohn	Pheroprax	445	4	0	0	0
4	10/06/05	4	Theysohn	Pheroprax	594	0	0	0	0
4	10/06/05	4	Theysohn	Pheroprax	793	0	0	0	0
4	10/06/05	4	Theysohn	Pheroprax	735	0	0	0	1
4	10/06/05	4	Theysohn	Pheroprax	378	0	0	0	0
4	10/06/05	4	Theysohn	Pheroprax	744	0	0	0	1
4	10/06/05	4	Theysohn	Pheroprax	1144	0	0	0	0
4	10/06/05	4	Theysohn	Pheroprax	735	0	0	0	0
